# Supplementary material for: Greenspace and Atopic Sensitization in Children and Adolescents—A Systematic Review
Source: PubMed Central journal article supplement (PMC6265981; doi:10.3390/ijerph15112539), 2018-11-13
Supplement: ijerph-15-02539-s001.pdf [file ijerph-15-02539-s001.pdf]

Table S1: Ovid search strategy for initial literature review

|    |                                                                            |
|----|----------------------------------------------------------------------------|
| 1  | "allergic sen*"                                                            |
| 2  | atopy                                                                      |
| 3  | atopic                                                                     |
| 4  | Hypersensitivity                                                           |
| 5  | "Skin Prick"                                                               |
| 6  | IgE                                                                        |
| 7  | "Immunoglobulin E"                                                         |
| 8  | Sensiti?ation                                                              |
| 9  | 1 or 2 or 3 or 4 or 5 or 6 or 7 or 8                                       |
| 10 | NDVI                                                                       |
| 11 | "Normali?ed Difference Vegetation Index"                                   |
| 12 | EVI                                                                        |
| 13 | "Enhanced Vegetation Index"                                                |
| 14 | "Leaf Area Index"                                                          |
| 15 | biosphere                                                                  |
| 16 | "residential green*"                                                       |
| 17 | "green space"                                                              |
| 18 | greenness                                                                  |
| 19 | "tree canopy"                                                              |
| 20 | "tree cover"                                                               |
| 21 | vegetation                                                                 |
| 22 | greenspace                                                                 |
| 23 | 10 or 11 or 12 or 13 or 14 or 15 or 16 or 17 or 18 or 19 or 20 or 21 or 22 |
| 23 | 9 AND 23                                                                   |

("allergic sen\*" OR atopy OR atopic OR Hypersensitivity OR IgE OR "Immunoglobulin E" OR Sensiti?ation) AND (NDVI OR "Normali?ed Difference Vegetation Index" OR "Enhanced Vegetation Index" OR "residential green\*" OR "green space")

Table S2: Specific aeroallergens tested for in each cohort

|                                         | Ruokolainen et al. 2015    |            |       | Lovasi et al. 2013<br>CCCEH | Fuertes et al. 2016  |          |       |       |      |       |      |
|-----------------------------------------|----------------------------|------------|-------|-----------------------------|----------------------|----------|-------|-------|------|-------|------|
|                                         | Hanski et al. 2012<br>KARA | DIABIMMUNE | LUKAS |                             | Fuertes et al. 2014b |          |       |       |      |       |      |
|                                         |                            |            |       |                             | GINIplus             | LISAplus | BAMSE | CAPPS | MACS | PIAMA | SAGE |
| <i>Alder</i>                            |                            |            | x     |                             |                      |          |       |       |      |       |      |
| <i>Alternaria</i>                       |                            |            | x     |                             |                      |          |       | x     |      | x     |      |
| <i>Birch</i>                            | x                          | x          | x     |                             | x                    | x        | x     |       |      | x     |      |
| <i>Cat</i>                              | x                          | x          | x     | x                           | x                    | x        | x     | x     | x    | x     | x    |
| <i>Cockroach</i>                        |                            |            |       | x                           |                      |          |       | x     |      |       |      |
| <i>Dactylis glomerata</i>               |                            |            |       |                             |                      |          |       |       |      | x     |      |
| <i>Dog</i>                              | x                          | x          | x     | x                           |                      | x        | x     | x     |      | x     | x    |
| <i>European Hazel</i>                   |                            |            | x     |                             |                      |          |       |       |      |       |      |
| <i>Feathers</i>                         |                            |            |       |                             |                      |          |       | x     |      |       | x    |
| <i>'Grass'</i>                          |                            |            | x     | x                           |                      |          |       | x     |      |       | x    |
| <i>Horse</i>                            | x                          |            | x     |                             |                      |          |       |       |      |       |      |
| <i>House dust mite</i>                  | x                          | x          | x     | x                           | x                    | x        | x     | x     | x    | x     |      |
| <i>Mold</i>                             | x                          |            |       | x                           | x                    | x        | x     | x     |      |       |      |
| <i>Mouse</i>                            |                            |            |       | x                           |                      |          |       |       |      |       |      |
| <i>Mugwort</i>                          | x                          |            | x     |                             | x                    | x        | x     |       |      |       |      |
| <i>Plantain</i>                         |                            |            | x     |                             |                      |          |       |       |      |       |      |
| <i>ragweed</i>                          |                            |            |       | x                           |                      |          |       | x     |      |       | x    |
| <i>Rye</i>                              |                            |            | x     |                             | x                    | x        |       |       | x    |       |      |
| <i>Timothy grass</i>                    | x                          | x          |       |                             | x                    | x        | x     |       |      |       |      |
| <i>'Trees'</i>                          |                            |            |       | x                           |                      |          |       | x     |      |       | x    |
| <i>'Weeds'</i>                          |                            |            |       |                             |                      |          |       | x     |      |       | x    |
| <i>Total number of allergens tested</i> | 8                          | 5          | 12    | 9                           | 7                    | 8        | 7     | 11    | 3    | 6     | 7    |

Table S3: Bias assessment

| Author (Year)                                     | Exposure definition bias | Exposure misclassification bias | Selection bias        | Ascertainment bias    | Confounding bias      | Confidence intervals |
|---------------------------------------------------|--------------------------|---------------------------------|-----------------------|-----------------------|-----------------------|----------------------|
| Hanski I, von Hertzen L. (2012)                   | Moderate risk of bias    | Low risk of bias                | High risk of bias     | No risk of bias       | Moderate risk of bias | High risk of bias    |
| Lovasi, GS, O'Neil-Dunne, JPM et al. (2013)       | No risk of bias          | No risk of bias                 | High risk of bias     | No risk of bias       | Moderate risk of bias | Low risk of bias     |
| Fuertes, E, Markevych, I, et al. (2014)           | No risk of bias          | Moderate risk of bias           | Moderate risk of bias | No risk of bias       | Low risk of bias      | Low risk of bias     |
| Ruokolainen L, von Hertzen L, Fyhrquist N. (2015) | Moderate risk of bias    | Low risk of bias                | Moderate risk of bias | Low risk of bias      | High risk of bias     | High risk of bias    |
| Fuertes, E., I. Markevych, et al. (2016).         | No risk of bias          | Moderate risk of bias           | Moderate risk of bias | Moderate risk of bias | Low risk of bias      | Low risk of bias     |

■ No risk of bias     
 ■ Low risk of bias     
 ■ Moderate risk of bias     
 ■ High risk of bias
